# Supplementary material for: Inequality of Paediatric Workforce Distribution in China
Source: PubMed Central journal article supplement (PMC4962244; doi:10.3390/ijerph13070703), 2016-07-12
Supplement: ijerph-13-00703-s001.pdf [file ijerph-13-00703-s001.pdf]

# Supplementary Materials: Inequality of Paediatric Workforce Distribution in China

Peige Song, Zhenghong Ren, Xinlei Chang, Xuebei Liu and Lin An

**Table S1.** The demographic distribution of the paediatric workforce in the sampled districts/cities.

| Region  | Province     | Sampled District/City | Number of Paediatricians |                           |                            |                   | Number of Paediatric Nurses |                           |                            |                   | Number of Paediatric Workforce |                           |                            |                   |
|---------|--------------|-----------------------|--------------------------|---------------------------|----------------------------|-------------------|-----------------------------|---------------------------|----------------------------|-------------------|--------------------------------|---------------------------|----------------------------|-------------------|
|         |              |                       | /10,000 Population       | /10,000 Children <7 years | /10,000 Children <18 years | /1000 Live Births | /10,000 Population          | /10,000 Children <7 years | /10,000 Children <18 years | /1000 Live Births | /10,000 Population             | /10,000 children <7 years | /10,000 Children <18 years | /1000 Live Births |
| East    | Beijing      | Xicheng               | 4.34                     | 78.18                     | 38.31                      | 67.50             | 4.70                        | 84.59                     | 41.45                      | 73.02             | 9.04                           | 162.77                    | 79.77                      | 140.52            |
|         |              | Haidian               | 0.61                     | 16.33                     | 5.17                       | 11.88             | 0.66                        | 17.46                     | 5.53                       | 12.71             | 1.27                           | 33.79                     | 10.70                      | 24.60             |
|         | Beijing      | Shunyi                | 0.83                     | 21.94                     | 6.61                       | 12.99             | 0.44                        | 11.72                     | 3.53                       | 6.94              | 1.28                           | 33.65                     | 10.14                      | 19.93             |
|         |              | Pinggu                | 0.87                     | 22.38                     | 6.11                       | 12.37             | 1.03                        | 26.73                     | 7.30                       | 14.78             | 1.90                           | 49.11                     | 13.42                      | 27.15             |
|         | Tianjin      | Hexi                  | 5.39                     | 173.42                    | 52.10                      | 108.14            | 7.42                        | 238.87                    | 71.77                      | 148.95            | 12.81                          | 412.29                    | 123.87                     | 257.09            |
|         | Tianjin      | Dongli                | 0.37                     | 9.04                      | 2.51                       | 5.50              | 0.12                        | 2.88                      | 0.80                       | 1.75              | 0.48                           | 11.92                     | 3.31                       | 7.25              |
|         | Tianjin      | Wuqing                | 0.65                     | 10.50                     | 3.77                       | 9.08              | 0.22                        | 3.56                      | 1.28                       | 3.07              | 0.87                           | 14.06                     | 5.04                       | 12.15             |
|         | Tianjin      | Jinghai               | 0.70                     | 6.65                      | 3.09                       | 6.34              | 0.48                        | 4.58                      | 2.13                       | 4.36              | 1.17                           | 11.24                     | 5.23                       | 10.70             |
|         | Hebei        | Baoding               | 1.06                     | 12.32                     | 4.95                       | 8.23              | 1.10                        | 12.76                     | 5.13                       | 8.53              | 2.17                           | 25.08                     | 10.08                      | 16.77             |
|         | Liaoning     | Yingkou               | 0.95                     | 20.02                     | 6.42                       | 15.20             | 0.82                        | 17.32                     | 5.56                       | 13.16             | 1.77                           | 37.34                     | 11.98                      | 28.36             |
|         | Shanghai     | Yangpu                | 1.84                     | 47.93                     | 14.15                      | 40.19             | 2.91                        | 75.97                     | 22.43                      | 63.71             | 4.74                           | 123.90                    | 36.58                      | 103.90            |
|         | Shanghai     | Minhang               | 2.29                     | 89.95                     | 18.67                      | 35.45             | 3.26                        | 127.90                    | 26.55                      | 50.41             | 5.55                           | 217.86                    | 45.23                      | 85.86             |
|         | Shanghai     | Jiading               | 0.68                     | 7.27                      | 8.28                       | 13.93             | 0.35                        | 3.71                      | 4.22                       | 7.11              | 1.03                           | 10.98                     | 12.50                      | 21.04             |
|         | Shanghai     | Chongming             | 0.85                     | 20.52                     | 7.92                       | 17.96             | 0.85                        | 20.52                     | 7.92                       | 17.96             | 1.71                           | 41.05                     | 15.85                      | 35.92             |
|         | Jiangsu      | Huaian                | 0.96                     | 15.46                     | 4.37                       | 8.70              | 0.73                        | 11.73                     | 3.32                       | 6.60              | 1.68                           | 27.18                     | 7.69                       | 15.30             |
|         | Zhejiang     | Jinhua                | 1.11                     | 19.59                     | 6.00                       | 12.80             | 0.65                        | 11.56                     | 3.54                       | 7.55              | 1.76                           | 31.15                     | 9.54                       | 20.35             |
|         | Fujian       | Sanming               | 1.31                     | 17.11                     | 6.49                       | 10.70             | 1.35                        | 17.63                     | 6.68                       | 11.02             | 2.66                           | 34.75                     | 13.17                      | 21.72             |
|         | Shandong     | Jining                | 1.77                     | 22.16                     | 8.64                       | 14.69             | 1.61                        | 20.25                     | 7.89                       | 13.43             | 3.38                           | 42.42                     | 16.53                      | 28.12             |
|         | Guangdong    | Jiangmen              | 1.46                     | 24.20                     | 7.50                       | 16.18             | 1.67                        | 27.70                     | 8.59                       | 18.52             | 3.13                           | 51.90                     | 16.09                      | 34.70             |
|         | Guangdong    | Chaozhou              | 0.75                     | 9.04                      | 3.09                       | 6.64              | 0.79                        | 9.49                      | 3.25                       | 6.98              | 1.54                           | 18.53                     | 6.34                       | 13.62             |
| Central | Shanxi       | Jinzhong              | 1.05                     | 14.22                     | 4.78                       | 10.46             | 0.78                        | 10.63                     | 3.58                       | 7.82              | 1.83                           | 24.85                     | 8.36                       | 18.29             |
|         |              | Jilin                 | Baishan                  | 1.42                      | 37.82                      | 9.70              | 26.08                       | 1.10                      | 29.39                      | 7.54              | 20.27                          | 2.52                      | 67.21                      | 17.25             |
|         | Heilongjiang | Qitaihe               | 1.20                     | 25.01                     | 7.30                       | 16.91             | 1.02                        | 21.37                     | 6.24                       | 14.45             | 2.22                           | 46.38                     | 13.54                      | 31.36             |
|         |              | Anhui                 | Anqing                   | 1.16                      | 12.75                      | 5.31              | 11.95                       | 1.08                      | 11.90                      | 4.96              | 11.15                          | 2.23                      | 24.65                      | 10.26             |
|         | Jiangxi      | Ganzhou               | 1.24                     | 13.10                     | 4.24                       | 9.37              | 1.50                        | 15.86                     | 5.13                       | 11.35             | 2.75                           | 28.97                     | 9.37                       | 20.72             |
|         | Henan        | Louyang               | 1.33                     | 14.27                     | 5.26                       | 12.37             | 1.38                        | 14.88                     | 5.48                       | 12.89             | 2.71                           | 29.15                     | 10.74                      | 25.26             |
|         | Henan        | Xinyang               | 1.22                     | 10.72                     | 4.28                       | 10.02             | 1.35                        | 11.86                     | 4.73                       | 11.09             | 2.57                           | 22.58                     | 9.01                       | 21.11             |
|         | Hubei        | Huanggang             | 0.92                     | 12.48                     | 4.17                       | 8.34              | 1.07                        | 14.63                     | 4.89                       | 9.77              | 1.99                           | 27.11                     | 9.06                       | 18.11             |
|         | Hunan        | Yiyang                | 0.44                     | 6.45                      | 2.39                       | 3.83              | 0.83                        | 12.16                     | 4.50                       | 7.22              | 1.27                           | 18.61                     | 6.88                       | 11.05             |

Table S1. Cont.

| Region | Province       | Sampled District/City | Number of Paediatricians |                           |                            |                   | Number of Paediatric Nurses |                           |                            |                   | Number of Paediatric Workforce |                           |                            |                   |
|--------|----------------|-----------------------|--------------------------|---------------------------|----------------------------|-------------------|-----------------------------|---------------------------|----------------------------|-------------------|--------------------------------|---------------------------|----------------------------|-------------------|
|        |                |                       | /10,000 Population       | /10,000 Children <7 years | /10,000 Children <18 years | /1000 Live Births | /10,000 Population          | /10,000 Children <7 years | /10,000 Children <18 years | /1000 Live Births | /10,000 Population             | /10,000 children <7 years | /10,000 Children <18 years | /1000 Live Births |
| West   | Inner Mongolia | Bayannaer             | 2.08                     | 47.22                     | 12.51                      | 28.43             | 1.75                        | 39.75                     | 10.53                      | 23.94             | 3.84                           | 86.97                     | 23.04                      | 52.37             |
|        | Guangxi        | Baise                 | 1.76                     | 17.25                     | 6.94                       | 12.66             | 2.07                        | 20.34                     | 8.18                       | 14.93             | 3.83                           | 37.60                     | 15.12                      | 27.59             |
|        | Chongqing      | Nanan                 | 1.03                     | 14.31                     | 4.58                       | 14.47             | 1.17                        | 16.32                     | 5.22                       | 16.51             | 2.20                           | 30.63                     | 9.80                       | 30.98             |
|        | Chongqing      | Yongchuan             | 0.79                     | 11.85                     | 3.55                       | 7.36              | 0.65                        | 9.80                      | 2.94                       | 6.09              | 1.44                           | 21.64                     | 6.48                       | 13.45             |
|        | Chongqing      | Qijiang               | 0.66                     | 22.05                     | 9.95                       | 7.01              | 1.41                        | 47.02                     | 21.22                      | 14.94             | 2.07                           | 69.08                     | 31.17                      | 21.95             |
|        | Chongqing      | Chengkou              | 1.55                     | 10.64                     | 2.76                       | 10.97             | 0.78                        | 5.32                      | 1.38                       | 5.48              | 2.33                           | 15.96                     | 4.14                       | 16.45             |
|        | Sichuan        | Mianyang              | 1.53                     | 27.37                     | 8.23                       | 17.67             | 1.42                        | 25.51                     | 7.66                       | 16.46             | 2.95                           | 52.88                     | 15.89                      | 34.13             |
|        | Sichuan        | Ziyang                | 1.29                     | 8.13                      | 5.96                       | 13.16             | 1.13                        | 7.12                      | 5.22                       | 11.52             | 2.43                           | 15.25                     | 11.17                      | 24.68             |
|        | Guizhou        | Qiannan               | 0.63                     | 6.36                      | 2.22                       | 4.38              | 0.57                        | 5.76                      | 2.01                       | 3.97              | 1.20                           | 12.12                     | 4.22                       | 8.35              |
|        | Yunnan         | Xishuangbanna         | 0.90                     | 10.12                     | 3.99                       | 7.76              | 0.60                        | 6.75                      | 2.66                       | 5.17              | 1.50                           | 16.87                     | 6.65                       | 12.93             |
|        | Shaanxi        | Xi'an                 | 1.61                     | 31.60                     | 8.98                       | 19.76             | 2.45                        | 48.25                     | 13.72                      | 30.17             | 4.06                           | 79.85                     | 22.70                      | 49.92             |
|        | Gansu          | Jinchang              | 1.55                     | 23.22                     | 8.09                       | 18.61             | 1.47                        | 21.93                     | 7.64                       | 17.58             | 3.02                           | 45.15                     | 15.73                      | 36.19             |
|        | Qinghai        | Xining                | 1.45                     | 24.46                     | 6.63                       | 14.42             | 2.25                        | 37.92                     | 10.27                      | 22.35             | 3.69                           | 62.38                     | 16.90                      | 36.77             |
|        | Ningxia        | Zhongwei              | 1.39                     | 15.83                     | 4.62                       | 10.98             | 1.37                        | 15.62                     | 4.56                       | 10.83             | 2.76                           | 31.45                     | 9.19                       | 21.81             |
|        | Xinjiang       | Yili                  | 1.41                     | 15.04                     | 5.99                       | 8.51              | 1.30                        | 13.79                     | 5.49                       | 7.80              | 2.71                           | 28.83                     | 11.48                      | 16.31             |

**Table S2.** The geographic distribution of the paediatric workforce in the sampled districts/cities.

| Region  | Province     | Sampled District /City | Number of Paediatricians /Square Kilometre | Number of Paediatric Nurses /Square Kilometre | Number of Paediatric Workforce /Square Kilometre |
|---------|--------------|------------------------|--------------------------------------------|-----------------------------------------------|--------------------------------------------------|
| East    | Beijing      | Xicheng                | 5.779                                      | 6.252                                         | 12.032                                           |
|         | Beijing      | Haidian                | 0.467                                      | 0.499                                         | 0.966                                            |
|         | Beijing      | Shunyi                 | 0.072                                      | 0.038                                         | 0.110                                            |
|         | Beijing      | Pinggu                 | 0.033                                      | 0.040                                         | 0.073                                            |
|         | Tianjin      | Hexi                   | 12.676                                     | 17.459                                        | 30.135                                           |
|         | Tianjin      | Dongli                 | 0.048                                      | 0.015                                         | 0.063                                            |
|         | Tianjin      | Wuqing                 | 0.039                                      | 0.013                                         | 0.053                                            |
|         | Tianjin      | Jinghai                | 0.030                                      | 0.021                                         | 0.051                                            |
|         | Hebei        | Baoding                | 0.054                                      | 0.056                                         | 0.109                                            |
|         | Liaoning     | Yingkou                | 0.042                                      | 0.037                                         | 0.079                                            |
|         | Shanghai     | Yangpu                 | 3.976                                      | 6.303                                         | 10.279                                           |
|         | Shanghai     | Minhang                | 1.499                                      | 2.131                                         | 3.629                                            |
|         | Shanghai     | Jiading                | 0.215                                      | 0.110                                         | 0.325                                            |
|         | Shanghai     | Chongming              | 0.053                                      | 0.053                                         | 0.105                                            |
|         | Jiangsu      | Huaian                 | 0.046                                      | 0.035                                         | 0.080                                            |
|         | Zhejiang     | Jinhua                 | 0.054                                      | 0.032                                         | 0.086                                            |
|         | Fujian       | Sanming                | 0.014                                      | 0.015                                         | 0.029                                            |
|         | Shandong     | Jining                 | 0.128                                      | 0.117                                         | 0.244                                            |
|         | Guangdong    | Jiangmen               | 0.068                                      | 0.078                                         | 0.146                                            |
|         | Guangdong    | Chaozhou               | 0.054                                      | 0.057                                         | 0.111                                            |
| Central | Shanxi       | Jinzhong               | 0.021                                      | 0.016                                         | 0.036                                            |
|         | Jilin        | Baishan                | 0.011                                      | 0.008                                         | 0.019                                            |
|         | Heilongjiang | Qitaihe                | 0.018                                      | 0.015                                         | 0.033                                            |
|         | Anhui        | Anqing                 | 0.045                                      | 0.042                                         | 0.087                                            |
|         | Jiangxi      | Ganzhou                | 0.026                                      | 0.032                                         | 0.058                                            |
|         | Henan        | Louyang                | 0.057                                      | 0.059                                         | 0.116                                            |
|         | Henan        | Xinyang                | 0.039                                      | 0.044                                         | 0.083                                            |
|         | Hubei        | Huanggang              | 0.032                                      | 0.038                                         | 0.070                                            |
|         | Hunan        | Yiyang                 | 0.016                                      | 0.029                                         | 0.045                                            |

Table S2. Cont.

| Region | Province       | Sampled District /City | Number of Paediatricians /Square Kilometre | Number of Paediatric Nurses /Square Kilometre | Number of Paediatric Workforce /Square Kilometre |
|--------|----------------|------------------------|--------------------------------------------|-----------------------------------------------|--------------------------------------------------|
| West   | Inner Mongolia | Bayannaer              | 0.005                                      | 0.005                                         | 0.010                                            |
|        | Guangxi        | Baise                  | 0.017                                      | 0.020                                         | 0.037                                            |
|        | Chongqing      | Nanan                  | 0.296                                      | 0.338                                         | 0.635                                            |
|        | Chongqing      | Yongchuan              | 0.051                                      | 0.043                                         | 0.094                                            |
|        | Chongqing      | Qijiang                | 0.019                                      | 0.041                                         | 0.060                                            |
|        | Chongqing      | Chengkou               | 0.009                                      | 0.005                                         | 0.014                                            |
|        | Sichuan        | Mianyang               | 0.035                                      | 0.032                                         | 0.067                                            |
|        | Sichuan        | Ziyang                 | 0.060                                      | 0.052                                         | 0.112                                            |
|        | Guizhou        | Qiannan                | 0.008                                      | 0.007                                         | 0.015                                            |
|        | Yunnan         | Xishuangbanna          | 0.005                                      | 0.003                                         | 0.009                                            |
|        | Shaanxi        | Xi'an                  | 0.135                                      | 0.206                                         | 0.340                                            |
|        | Gansu          | Jinchang               | 0.008                                      | 0.007                                         | 0.015                                            |
|        | Qinghai        | Xining                 | 0.042                                      | 0.065                                         | 0.107                                            |
|        | Ningxia        | Zhongwei               | 0.010                                      | 0.010                                         | 0.020                                            |
|        | Xinjiang       | Yili                   | 0.001                                      | 0.001                                         | 0.003                                            |

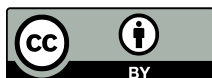

© 2016 by the authors; licensee MDPI, Basel, Switzerland. This article is an open access article distributed under the terms and conditions of the Creative Commons by Attribution (CC-BY) license (<http://creativecommons.org/licenses/by/4.0/>).
